# Supplementary material
Source: PubMed Central journal article supplement (PMC3913260)

Supplemental Figure 1

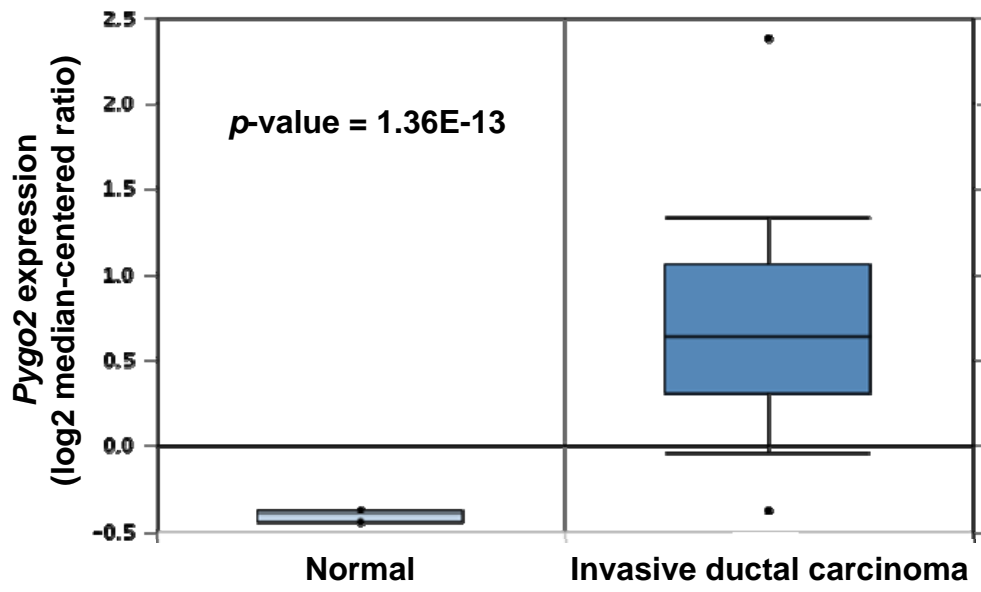

Supplemental Figure 2

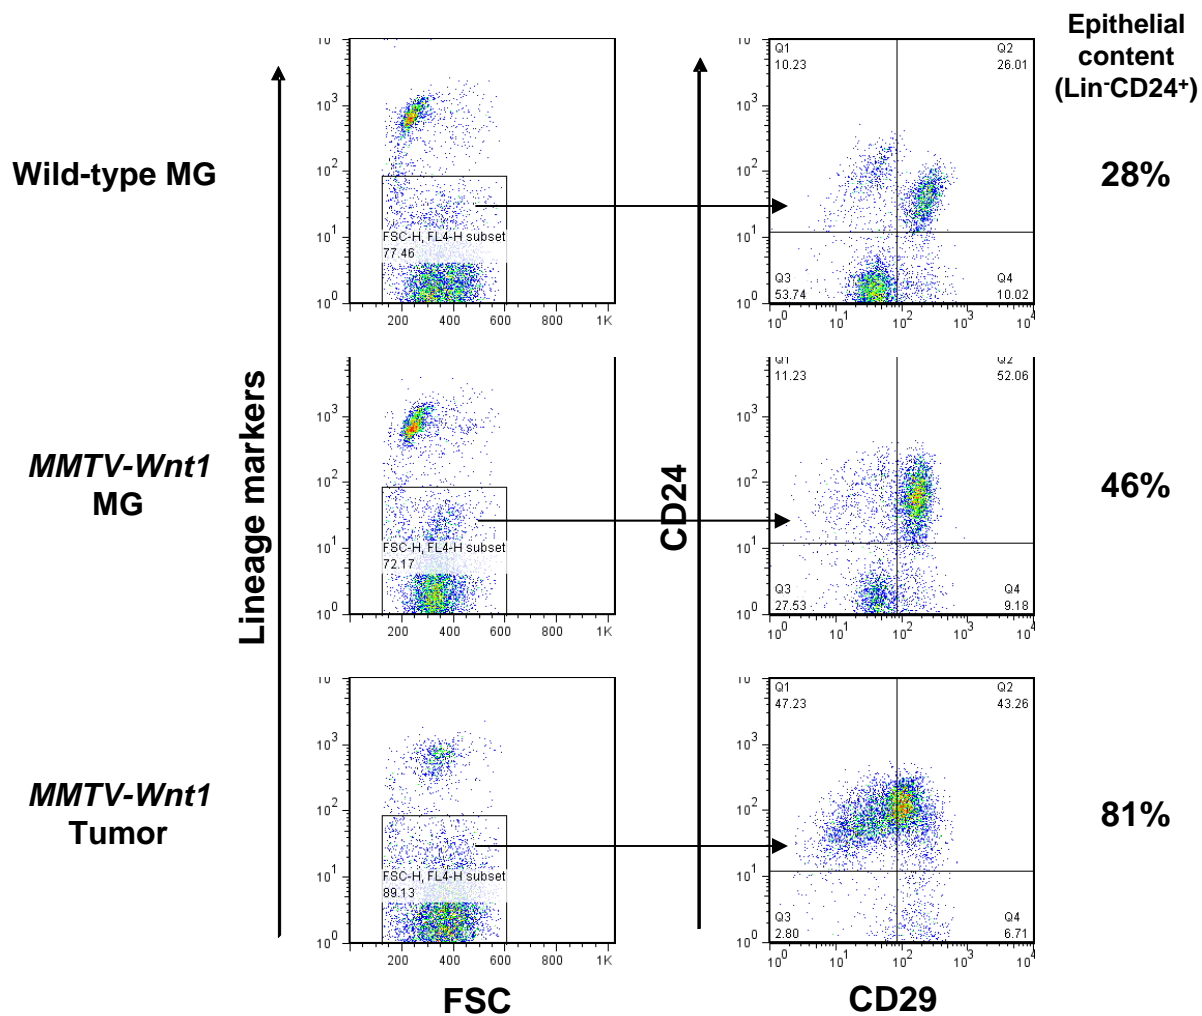

Supplemental Figure 3

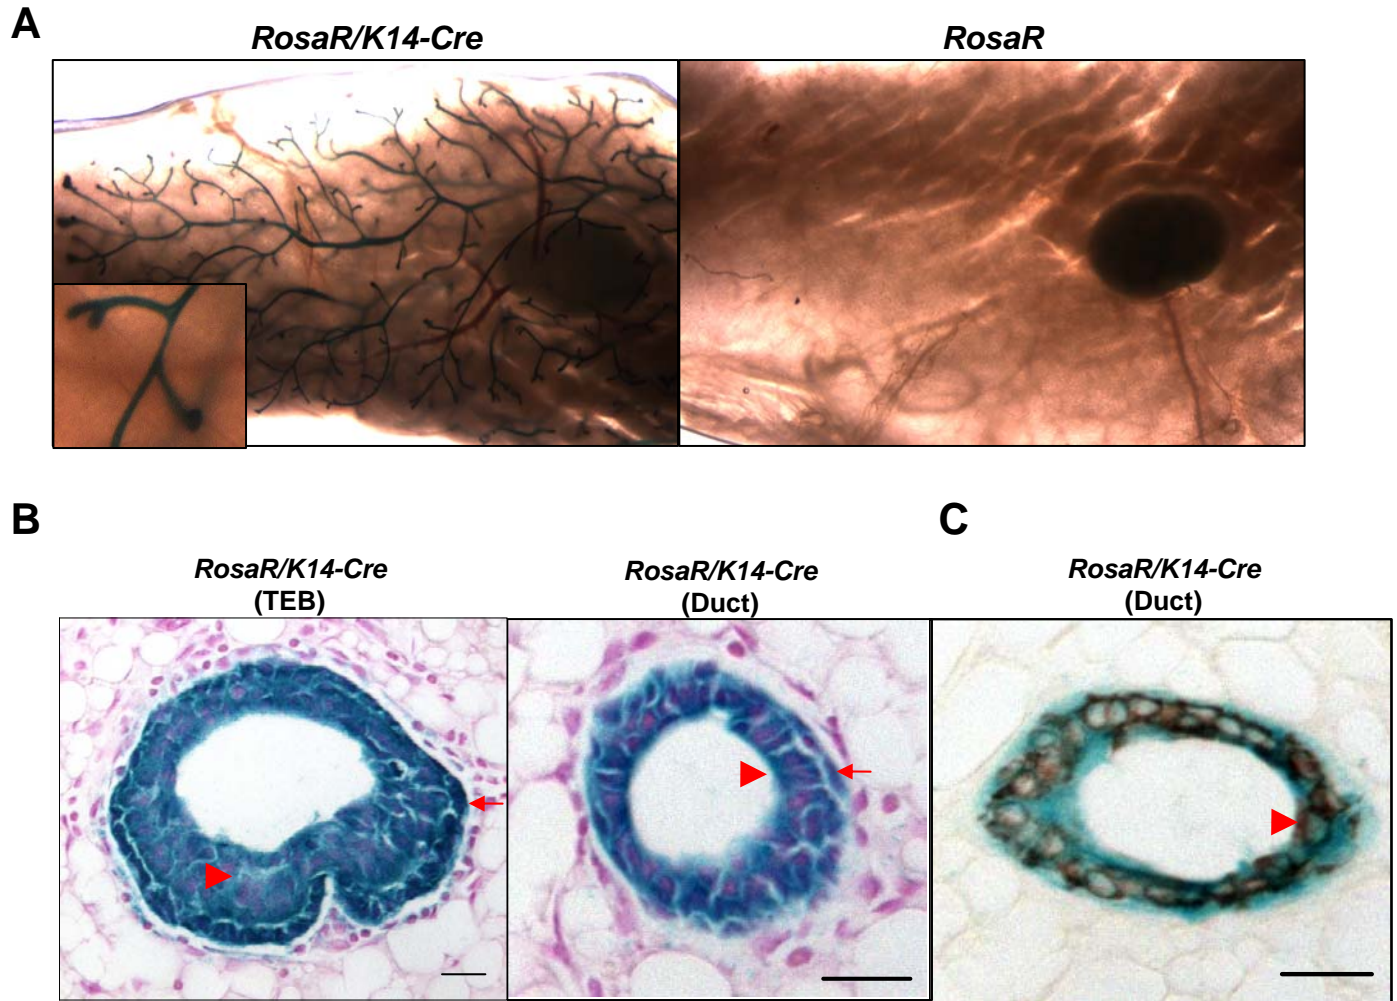

Supplemental Figure 4

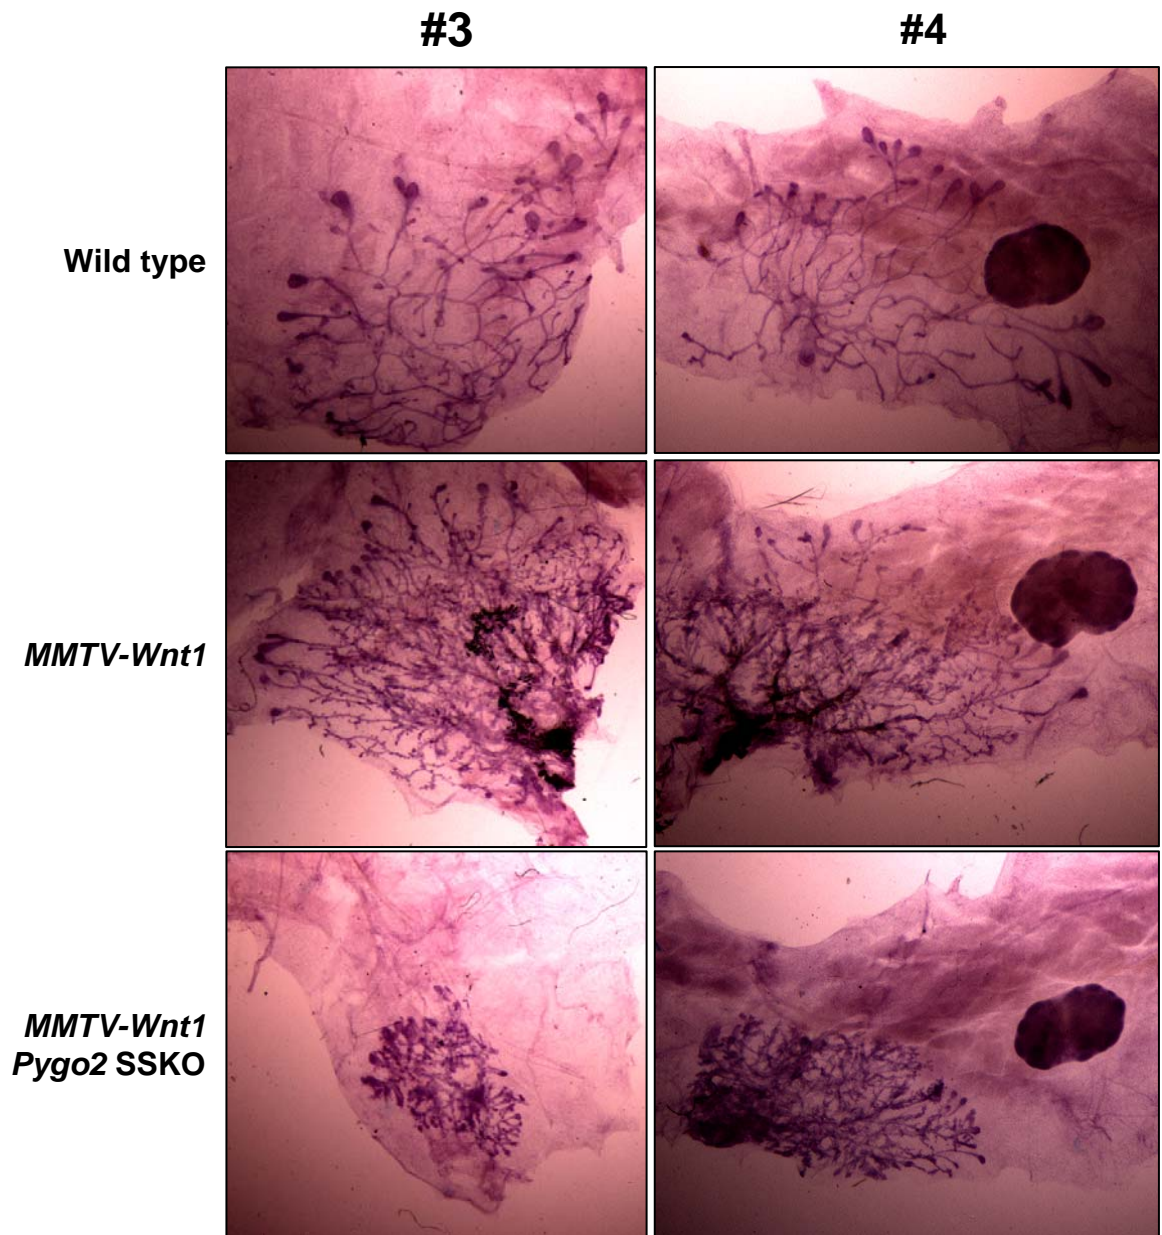

# Supplemental Figure 5

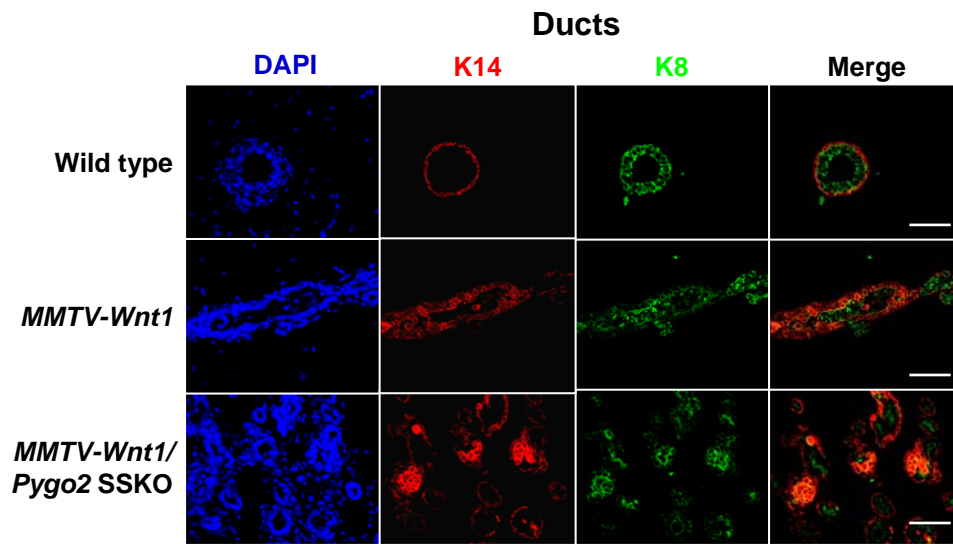

Supplemental Figure 6

A

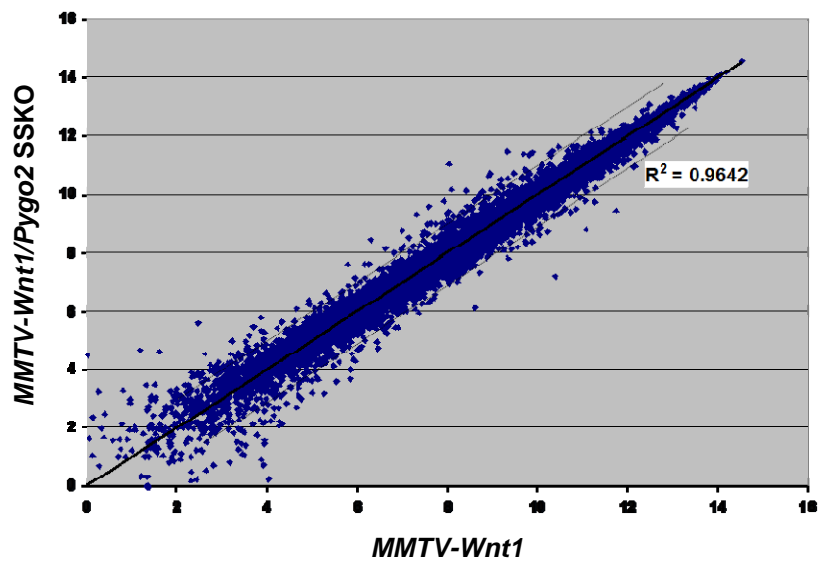

B

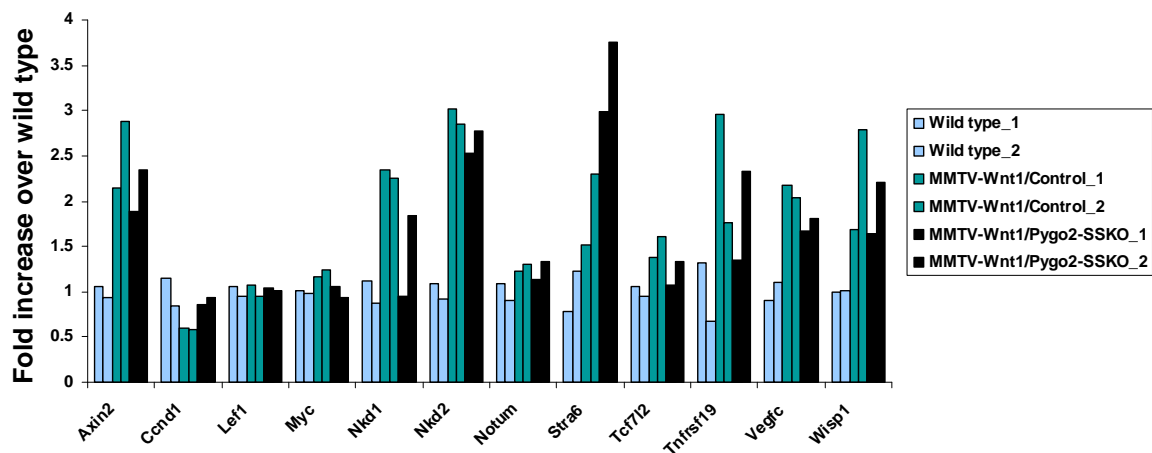

Supplemental Figure 7

*MMTV-Wnt1*

*MMTV-Wnt1*  
*Pygo2* SSKO

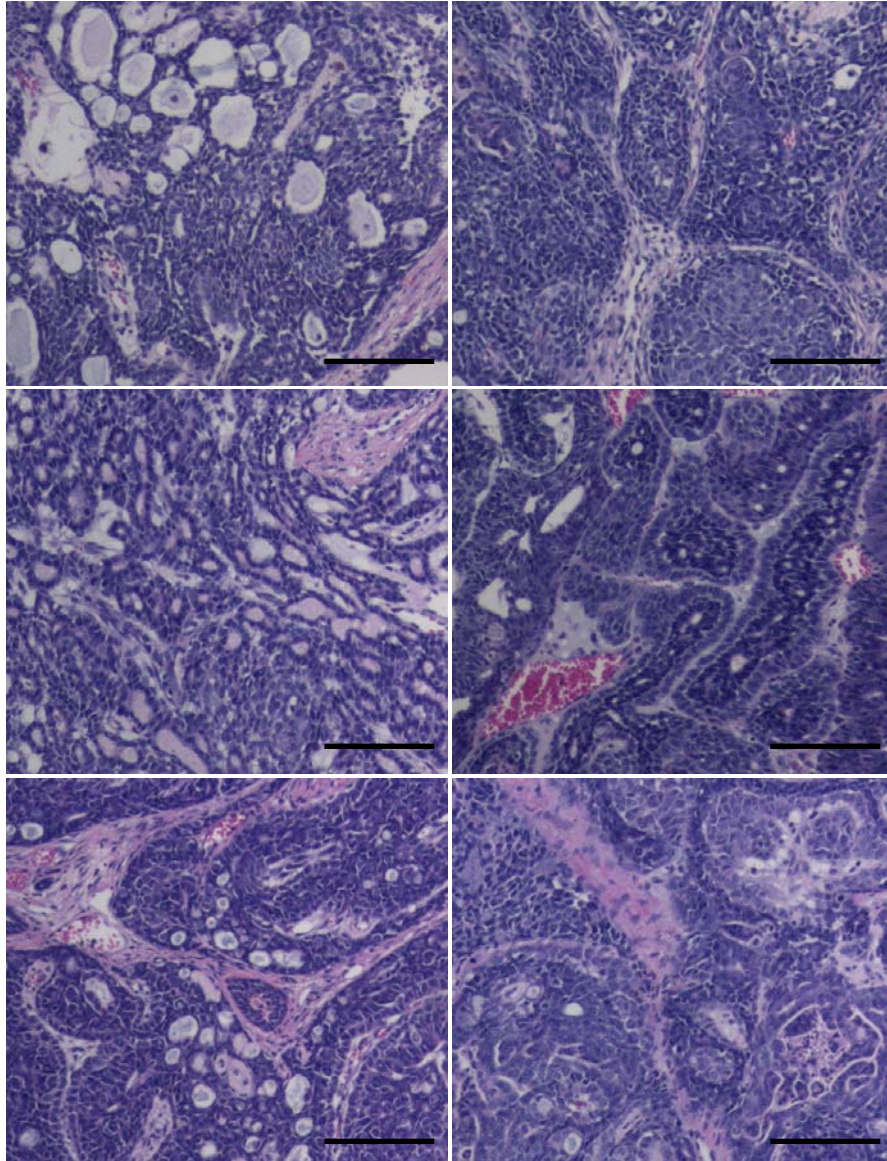

# Supplemental Figure 8

A

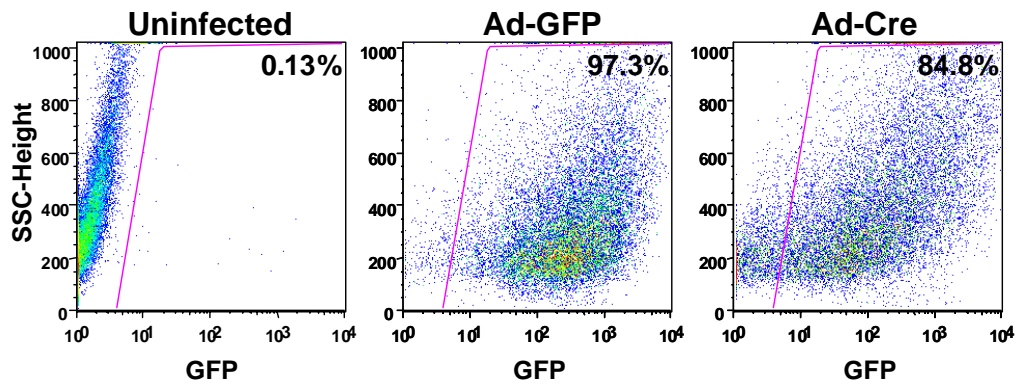

B

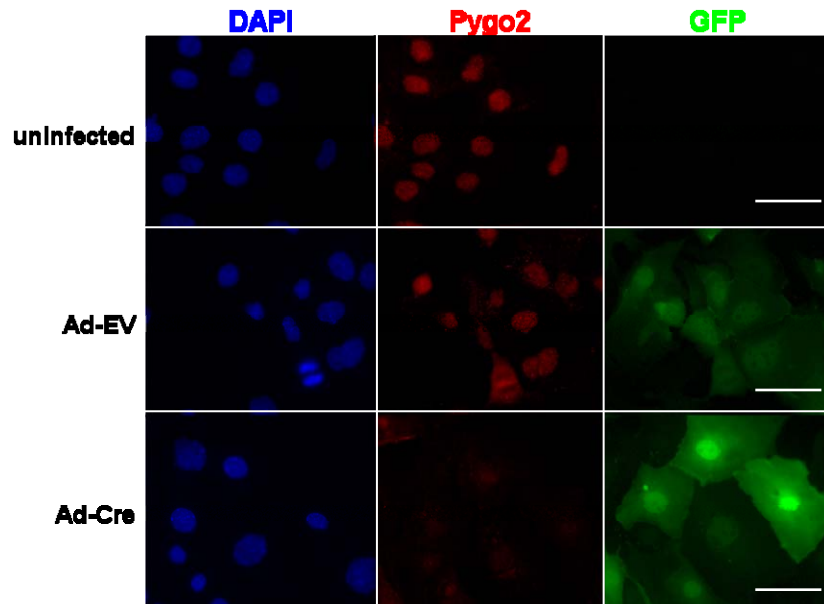



## Supplementary Figure 9

Ad-EV

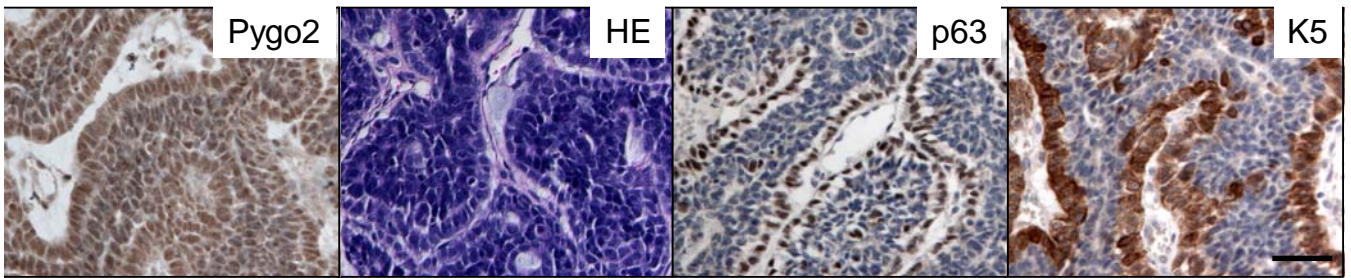

Ad-Cre "All"

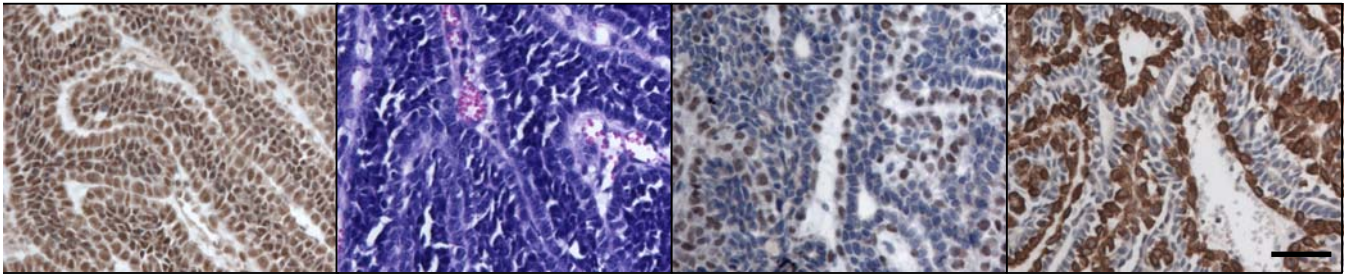

Ad-Cre "None"

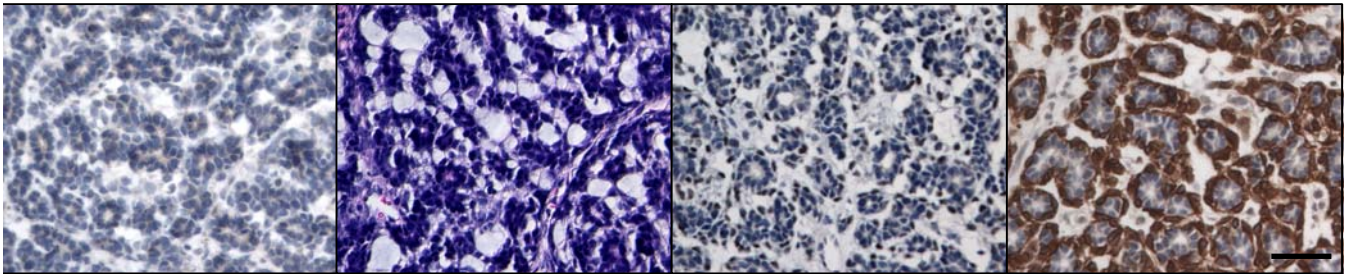

Supplemental Figure 10

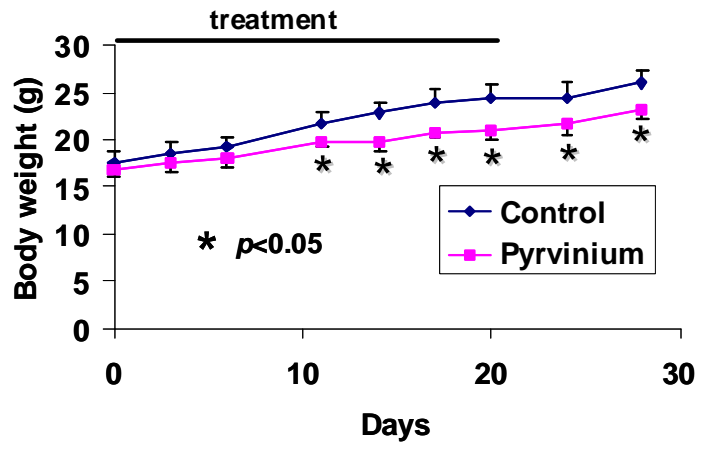

Supplement: NIHMS550029-supplement-2.pdf [file NIHMS550029-supplement-2.pdf]
